# Supplementary material for: Segmental NELL-1 Membranous Nephropathy Complicating Tiopronin Therapy
Source: PubMed Central journal article supplement — Kidney Int Rep. 2023 May 30;8(8):1683–6. doi: 10.1016/j.ekir.2023.05.023 (PMC10403669; doi:10.1016/j.ekir.2023.05.023), 2023-05-30
Supplement: mmc1.pdf [file mmc1.pdf]

## **Supplementary Material**

### **Supplementary References:**

S1. 9. Aksoy OY, Cakar N. Nephrotic syndrome in a patient with cystinuria: Answers. *Pediatr Nephrol* 2020; 35:979-80.

S2. Ferraccioli GF, Peri F, Nervetti A, et al. Tiopronin-nephropathy: clinical, pathological, immunological and immunogenetic characteristics. *Clin Exp Rheumatol* 1986; 4:9-15.

S3. Zheng Z, Xue Y, Jia J, Wei L, Shang W, Lin S. Tiopronin-induced membranous nephropathy: a case report. *Ren Fail* 2014; 36:1455-60.

S4. S Micallef, L Delicata, J Farrugia Agius, S Holwill. Tiopronin-induced membranous nephropathy in a patient with refractory familial cystinuria. *Br J Hosp Med* 2022; 83(8):1-4

S5. Jaffe IA. Adverse effects profile of sulfhydryl compounds in man. *Am J Med* 1986; 80: 471-6.

S6. Ruocco V, De Angelis E, Lombardi ML. Drug-induced pemphigus. II. Pathomechanisms and experimental investigations. *Clin Dermatol* 1993; 11:507-13.

S7. Gao Z, Wu N, Du X, Li H, Mei X, Song Y. Toxic Nephropathy Secondary to Chronic Mercury Poisoning: Clinical Characteristics and Outcomes. *Kidney Int Rep* 2022; 7:1189-97.

S8. R Miyazaki, H Ueda, A Hayashi, M Okabe, et al. Neural epidermal growth factor-like 1-positive membranous nephropathy with rheumatoid arthritis. *Kidney Int Rep* 2023 ; 8(4):921-924.
